# Supplementary material
Source: Springer Nature journal article supplement (https://www.springermedizin.de/resource/supplementary/12891_2012_1804_MOESM1_ESM.pdf/9509074)
Supplement: MOESM1 [file 9509074]

*Feb 09 05 10*  
*Peddy*

Take a look at the new OvidSP

Try it now!

Close **X**

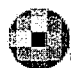

Wolters Kluwer  
Health

OvidSP

Current Search Results | Main Search  
Page | Support &  
Training | Help | Logoff

## Current Search History

~~Ovid MEDLINE(R) In-Process & Other Non-Indexed Citations and Ovid MEDLINE(R) 1950 to Present~~

| #  | Searches                                                                                                                                                                                                                                                                                                                                                                   | Results | Search Type |
|----|----------------------------------------------------------------------------------------------------------------------------------------------------------------------------------------------------------------------------------------------------------------------------------------------------------------------------------------------------------------------------|---------|-------------|
| 1  | shoulder dislocation/ or shoulder/ or shoulder impingement syndrome/ or shoulder fractures/ or shoulder pain/ or shoulder joint/ or acromioclavicular joint/ or thoracic outlet syndrome/ or scapula/ or acromion/ or rotator cuff/ or Upper Extremity/ or bursitis/ [mp=title, original title, abstract, name of substance word, subject heading word, unique identifier] | 33695   | Advanced    |
| 2  | (shoulder\$ or acromio\$ or acromia\$ or humeroscapular or rotator cuff\$).hw.                                                                                                                                                                                                                                                                                             | 25883   | Advanced    |
| 3  | (shoulder\$ or glenohumeral\$ or adhesive capsulit\$ or bursitis or rotator cuff\$ or acromio\$ or acromia\$ or scapula\$ or humeroscapular\$ or humero scapular\$ or glenohumeral\$).ti.                                                                                                                                                                                  | 19544   | Advanced    |
| 4  | (test\$ or index\$ or score\$ or scale\$ or survey\$ or indicator\$ or questionnaire\$ or measure\$ or examination\$ or intervention\$ or function\$ or performance\$ or rate or rating or disability or outcome).hw.                                                                                                                                                      | 2425807 | Advanced    |
| 5  | (outcome or outcomes or test or tests or index\$ or score\$ or scale\$ or survey\$ or questionnaire\$ or rate or rating).tw.                                                                                                                                                                                                                                               | 3174916 | Advanced    |
| 6  | "Diagnostic Techniques and Procedures"/                                                                                                                                                                                                                                                                                                                                    | 1526    | Advanced    |
| 7  | 1 or 2 or 3                                                                                                                                                                                                                                                                                                                                                                | 36024   | Advanced    |
| 8  | 4 or 5 or 6                                                                                                                                                                                                                                                                                                                                                                | 4552915 | Advanced    |
| 9  | 7 and 8                                                                                                                                                                                                                                                                                                                                                                    | 11896   | Advanced    |
| 10 | (shoulder\$ or glenohumeral\$ or adhesive capsulit\$ or bursitis or rotator cuff\$ or acromio\$ or acromia\$ or scapula\$ or humeroscapular\$ or humero scapular\$ or thoracic outlet syndrome).tw.                                                                                                                                                                        | 41919   | Advanced    |
| 11 | in-data-review.st.                                                                                                                                                                                                                                                                                                                                                         | 144337  | Advanced    |
| 12 | in-process.st.                                                                                                                                                                                                                                                                                                                                                             | 200745  | Advanced    |
| 13 | pubmed-not-medline.st.                                                                                                                                                                                                                                                                                                                                                     | 388762  | Advanced    |
| 14 | 5 and 10 and (11 or 12 or 13)                                                                                                                                                                                                                                                                                                                                              | 678     | Advanced    |
| 15 | 9 or 14                                                                                                                                                                                                                                                                                                                                                                    | 12316   | Advanced    |

|    |                                                                                                                                                                                                                                                                         |        |          |
|----|-------------------------------------------------------------------------------------------------------------------------------------------------------------------------------------------------------------------------------------------------------------------------|--------|----------|
| 16 | limit 15 to yr="2005 -Current"                                                                                                                                                                                                                                          | 6006   | Advanced |
| 17 | limit 16 to (danish or english or norwegian or swedish)                                                                                                                                                                                                                 | 5485   | Advanced |
| 18 | limit 17 to animals                                                                                                                                                                                                                                                     | 175    | Advanced |
| 19 | limit 18 to humans                                                                                                                                                                                                                                                      | 45     | Advanced |
| 20 | 18 not 19                                                                                                                                                                                                                                                               | 130    | Advanced |
| 21 | 17 not 20                                                                                                                                                                                                                                                               | 5355   | Advanced |
| 22 | limit 21 to ("all child (0 to 18 years)" or "all aged (65 and over)") [Limit not valid in EMBASE; records were retained]                                                                                                                                                | 2464   | Advanced |
| 23 | limit 22 to "all adult (19 plus years)" [Limit not valid in EMBASE; records were retained]                                                                                                                                                                              | 2139   | Advanced |
| 24 | 22 not 23                                                                                                                                                                                                                                                               | 325    | Advanced |
| 25 | 21 not 24                                                                                                                                                                                                                                                               | 5030   | Advanced |
| 26 | limit 25 to (embryo <first trimester> or infant <to one year> or child <unspecified age> or preschool child <1 to 6 years> or school child <7 to 12 years> or aged <65+ years>) [Limit not valid in Ovid MEDLINE(R),Ovid MEDLINE (R) In-Process; records were retained] | 5030   | Advanced |
| 27 | limit 26 to adult <18 to 64 years> [Limit not valid in Ovid MEDLINE(R),Ovid MEDLINE(R) In-Process; records were retained]                                                                                                                                               | 5030   | Advanced |
| 28 | 26 not 27                                                                                                                                                                                                                                                               | 0      | Advanced |
| 29 | 25 not 28                                                                                                                                                                                                                                                               | 5030   | Advanced |
| 30 | limit 29 to yr="2005"                                                                                                                                                                                                                                                   | 778    | Advanced |
| 31 | limit 29 to yr="2006"                                                                                                                                                                                                                                                   | 713    | Advanced |
| 32 | limit 29 to yr="2007"                                                                                                                                                                                                                                                   | 925    | Advanced |
| 33 | limit 29 to yr="2008"                                                                                                                                                                                                                                                   | 1023   | Advanced |
| 34 | limit 29 to yr="2009"                                                                                                                                                                                                                                                   | 1175   | Advanced |
| 35 | limit 29 to yr="2010"                                                                                                                                                                                                                                                   | 416    | Advanced |
| 36 | remove duplicates from 30                                                                                                                                                                                                                                               | 745    | Advanced |
| 37 | remove duplicates from 31                                                                                                                                                                                                                                               | 703    | Advanced |
| 38 | remove duplicates from 32                                                                                                                                                                                                                                               | 898    | Advanced |
| 39 | remove duplicates from 33                                                                                                                                                                                                                                               | 995    | Advanced |
| 40 | remove duplicates from 34                                                                                                                                                                                                                                               | 1109   | Advanced |
| 41 | remove duplicates from 35                                                                                                                                                                                                                                               | 412    | Advanced |
| 42 | 36 or 37 or 38 or 39 or 40 or 41                                                                                                                                                                                                                                        | 4862   | Advanced |
| 43 | (2005 jan or 2005 feb or 2005 mar or 2005 apr or jan 2005 or feb 2005 or mar 2005 or apr 2005).dp.                                                                                                                                                                      | 126971 | Advanced |
| 44 | 42 not 43                                                                                                                                                                                                                                                               | 4684   | Advanced |
| 45 | limit 44 to yr="2010"                                                                                                                                                                                                                                                   | 412    | Advanced |
| 46 | limit 44 to yr="2009"                                                                                                                                                                                                                                                   | 1109   | Advanced |

|    |                       |     |          |
|----|-----------------------|-----|----------|
| 47 | limit 44 to yr="2008" | 995 | Advanced |
| 48 | limit 44 to yr="2007" | 898 | Advanced |
| 49 | limit 44 to yr="2006" | 703 | Advanced |
| 50 | limit 44 to yr="2005" | 567 | Advanced |

---

Copyright (c) 2000-2010 [Ovid Technologies, Inc.](#)

By accessing or using OvidSP, you agree to Ovid's [terms of use](#), conditions and all applicable laws. If you do not agree to these terms you may not use this Site.

Version: OvidSP\_UI02.03.01\_H11\_2.101, SourceID 49793
